# Supplementary material
Source: publisher figshare collection journal article supplement (https://karger.figshare.com/articles/dataset/_/9792608)
Supplement: Supplementary file 1 [file 1 › 501291_sm1.pdf]

## Supplemental Materials

**Supplementary Table 1.** Uni- and multivariable linear regression analysis of clinical and biochemical variables for higher urine osmolality

|                                       | Univariate             |        | <sup>a</sup> Multivariable |        |
|---------------------------------------|------------------------|--------|----------------------------|--------|
|                                       | $\beta$ (95% CI for B) | P      | $\beta$ (95% CI for B)     | P      |
| Age (per year)                        | -0.06 (-1.39, -0.24)   | 0.01   | 0.11 (0.73, 2.31)          | <0.001 |
| Women (versus men)                    | -0.10 (-46.30, -17.60) | <0.001 | -0.12 (-53.31, -27.73)     | <0.001 |
| DM (versus non-DM)                    | -0.08 (-43.05, -13.40) | <0.001 | 0.05 (-2.33, 36.41)        | 0.09   |
| Age-adjusted CCI (per 1)              | -0.22 (-19.16, -12.89) | <0.001 | -0.08 (-12.17, 0.89)       | 0.09   |
| SBP (per mmHg)                        | -0.07 (-1.15, -0.27)   | 0.002  | -0.002 (-0.42, 0.38)       | 0.9    |
| BMI (per kg/m <sup>2</sup> )          | 0.11 (3.07, 7.22)      | <0.001 | 0.12 (3.98, 7.75)          | <0.001 |
| Albumin (per g/L)                     | 0.15 (40.70, 73.93)    | <0.001 | 0.01 (-16.21, 22.64)       | 0.75   |
| Parathyroid hormone (per ng/L)        | -0.28 (-0.67, -0.49)   | <0.001 | -0.07 (-0.25, -0.06)       | 0.001  |
| LDL-C (per mmol/L)                    | 0.07 (0.12, 0.57)      | 0.002  | 0.03 (-0.04, 0.38)         | 0.10   |
| Diuretics user (versus non-user)      | -0.11 (-53.28, -23.30) | <0.001 | 0.01 (-12.58, 16.07)       | 0.81   |
| eGFR (per mL/min/1.73m <sup>2</sup> ) | 0.45 (2.19, 2.61)      | <0.001 | 0.41 (1.89, 2.48)          | <0.001 |
| UPCr (per g/g)                        | -0.20 (-18.97, -12.38) | <0.001 | -0.06 (-8.84, -0.34)       | 0.03   |
| UV (per 0.1 liter/day)                | -0.22 (-0.06, -0.04)   | <0.001 | -0.22 (- 0.06, -0.04)      | <0.001 |

*Abbreviations:* BMI, body mass index; CCI, Charlson comorbidity index; CI, confidence interval; DM, diabetes mellitus; eGFR, estimated glomerular filtration rate; LDL-C, low-density lipoprotein cholesterol; SBP, systolic blood pressure; UPCR, urinary protein-to-creatinine ratio; UV, urine volume.

**Supplementary Table 2.** The slopes of eGFR decline among three tertiles of urine osmolality

|           | <b>Slope of eGFR decline (mL/min/1.73 m<sup>2</sup>/year)</b> | <b>P</b>  |
|-----------|---------------------------------------------------------------|-----------|
| Tertile 1 | -2.65 (-2.92 to -2.38)                                        | reference |
| Tertile 2 | -2.23 (-2.52 to -1.93)                                        | 0.038     |
| Tertile 3 | -1.51 (-1.74 to -1.27)                                        | <0.001    |

*Note:* Data are expressed as the median (interquartile range). *Abbreviations:* eGFR, estimated glomerular filtration rate.

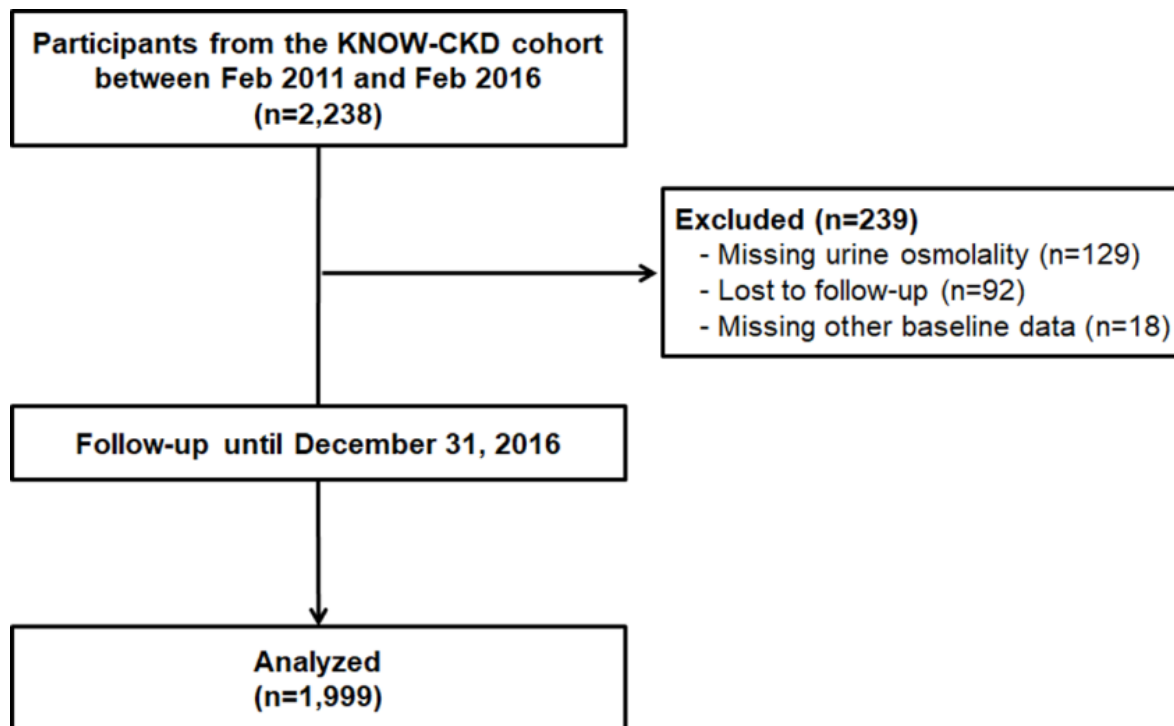

**Supplementary Figure 1. Study participants.** Among 2,238 participants from the KNOW-CKD, 1,999 patients were analyzed in this study. *Abbreviations:* KNOW-CKD, KoreaN Cohort Study for Outcome in Patients With Chronic Kidney Disease.

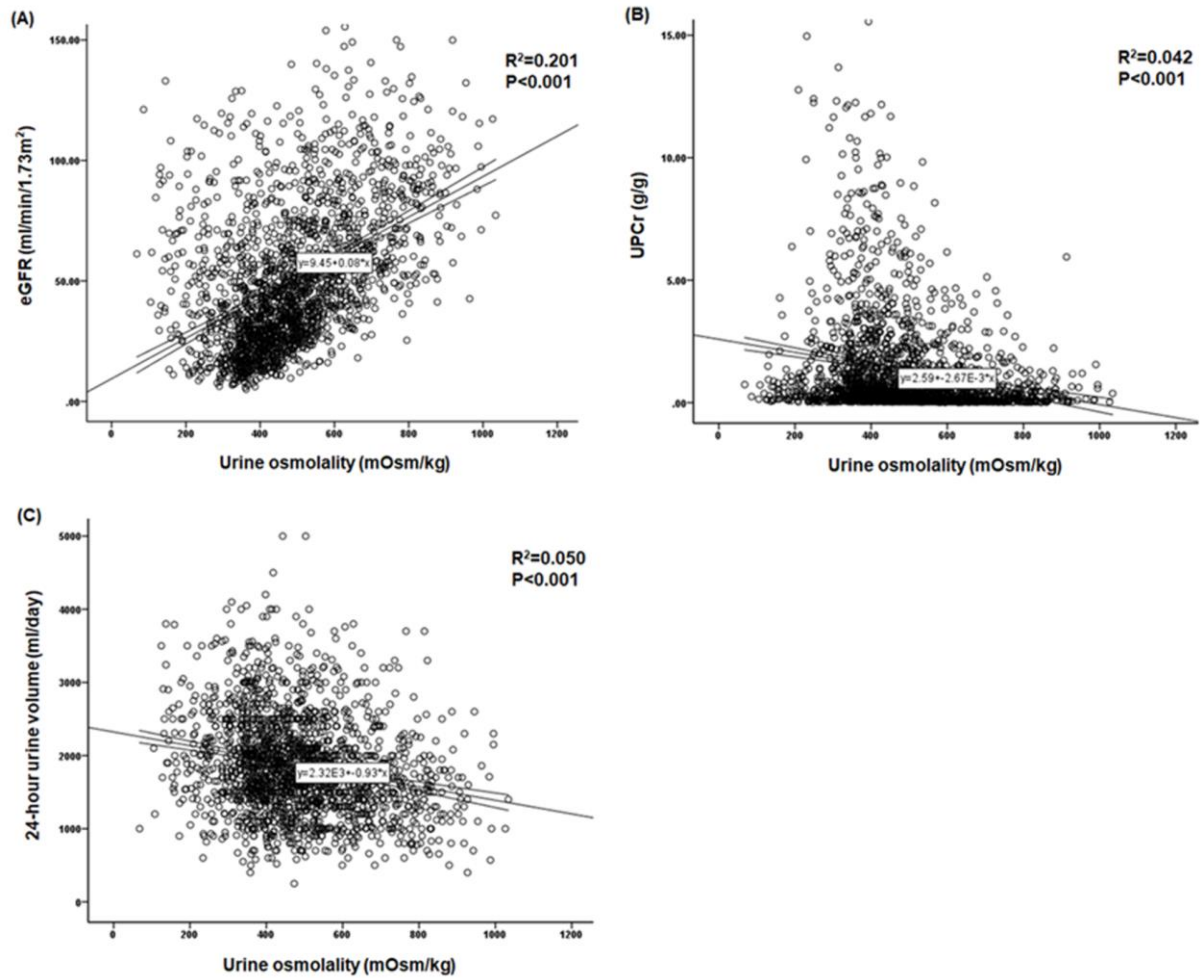

**Supplementary Figure 2.** Correlation of urine osmolality with (A) eGFR, (B) UPCr, and (C) 24-hour urine volume. *Abbreviations:* eGFR, estimated glomerular filtration rate; UPCr, urinary protein-to-creatinine ratio.
